# Supplementary material
Source: publisher site journal article supplement (https://www.dovepress.com/get_supplementary_file.php?f=451409.docx)
Supplement: Supplementary file 1 [file get_supplementary_file.php]

**Transforming growth factor-β-activated kinase 1 (TAK1) alleviates inflammatory joint pain in osteoarthritis and gouty arthritis animal models**

Robert Freeze1, Philip Hughes1,2, Timothy Haystead1,2, Scott Scarneo1

**Affiliations:**

1 EydisBio, Inc., Durham, NC USA

2 Department of Pharmacology and Cancer Biology, Duke University School of Medicine, Durham NC, USA

**Corresponding Author:**

Scott Scarneo, MBA, PhD

[scott.scarneo@eydisbio.com](mailto:scott.scarneo@eydisbio.com)

**Disclosures:** Funding statement. This work was funded by the NIH/NINDS R43 NS119087 to S.S and T. Conflict of Interest statement.Robert Freeze, Phillip Hughes, Timothy Haystead and Scott Scarneo all own shares in EydisBio. The funding sources had no influence on the experimental design, data analysis, or in the preparation of the manuscript.

**Supplemental Data**

**Supplemental Figure 1.** % weight change in (a) male and (b) female rats treated with HS-276 at 30 or 50 mg/kg BID p.o. over the 28-day MIA (osteoarthritis) study.

**Supplemental Figure 2. Effects of HS-276 treatment on cytokine expression in rat serum of MSU diseased animals.** Expression levels of TNF and IL-1β in male and female rats at study terminus.N=6/sex per group. Data represents mean±SEM.
